# Supplementary material
Source: PubMed Central journal article supplement (PMC7965648)
Supplement: 3484_materials.pdf [file 3484_materials.pdf]

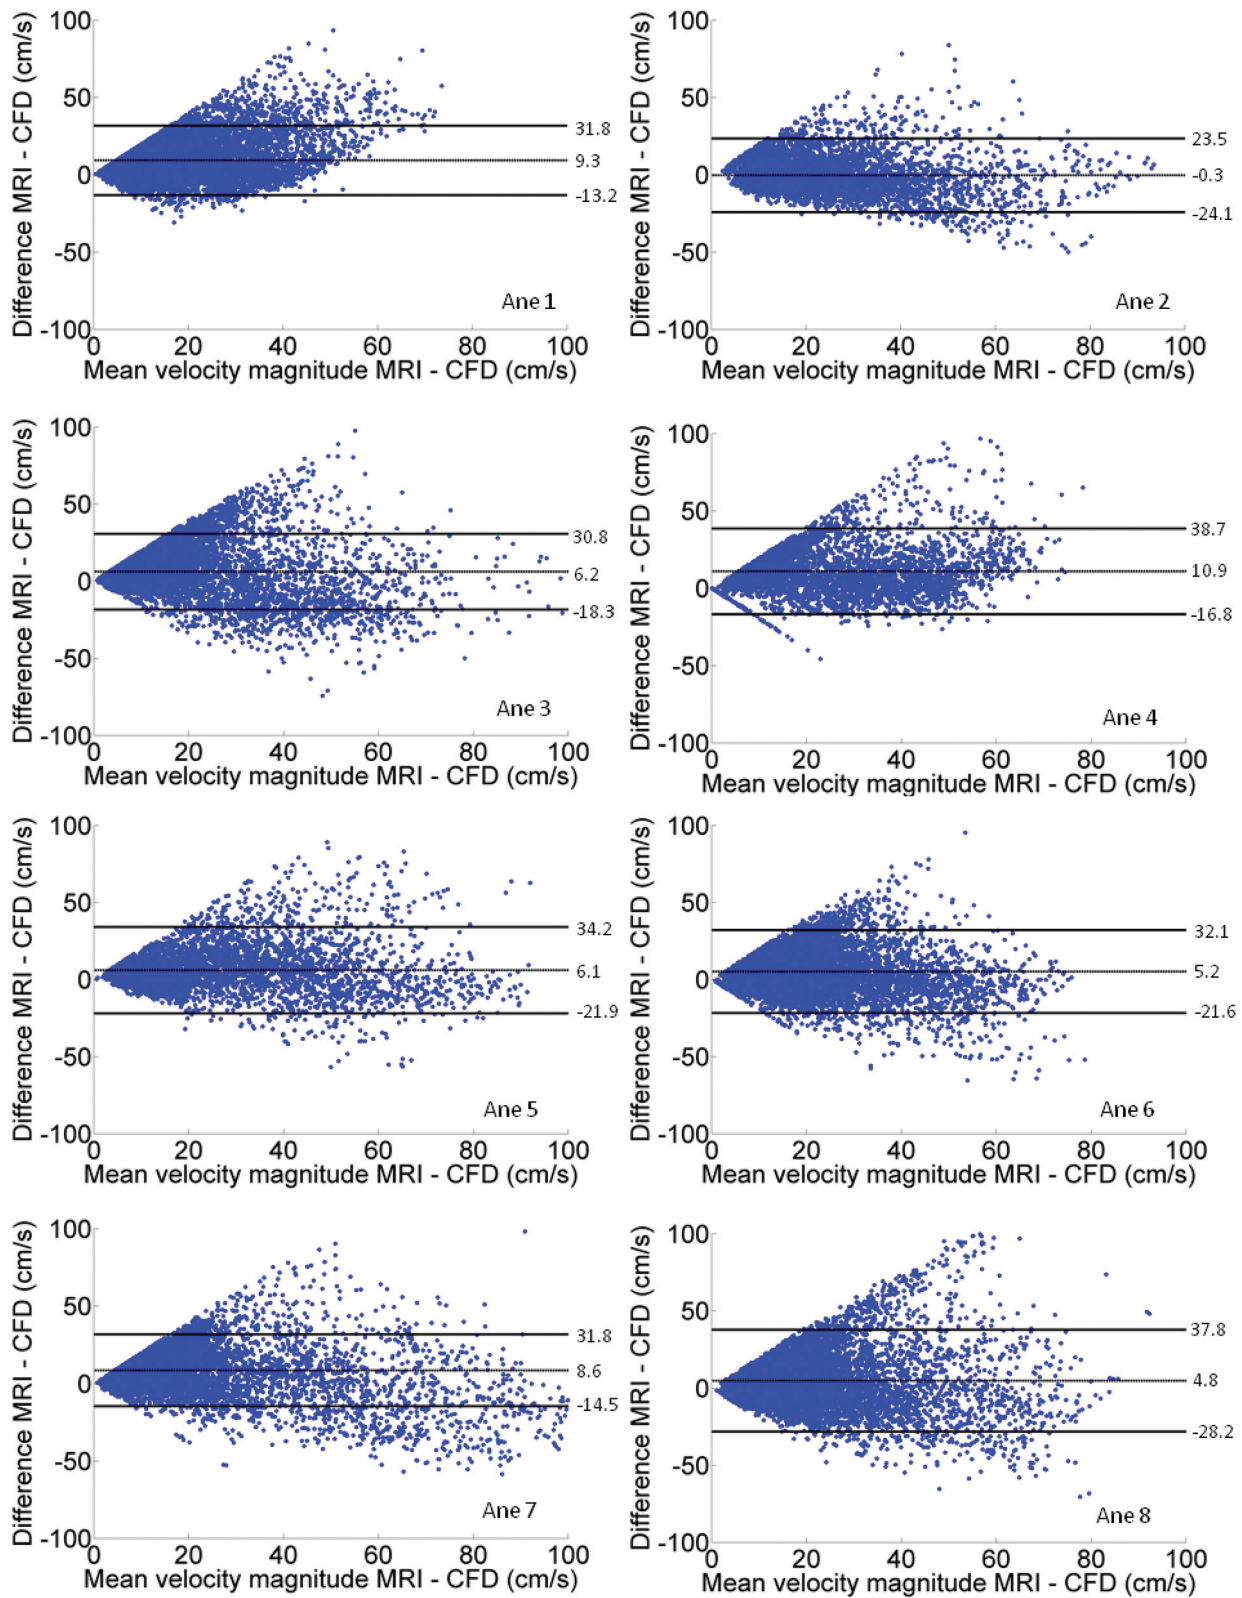

**ON-LINE FIG 1.** Bland-Altman plots showing the difference between velocity magnitude from 3D PC-MRI and CFD, with inflow boundary conditions obtained from 2D PC-MRI.

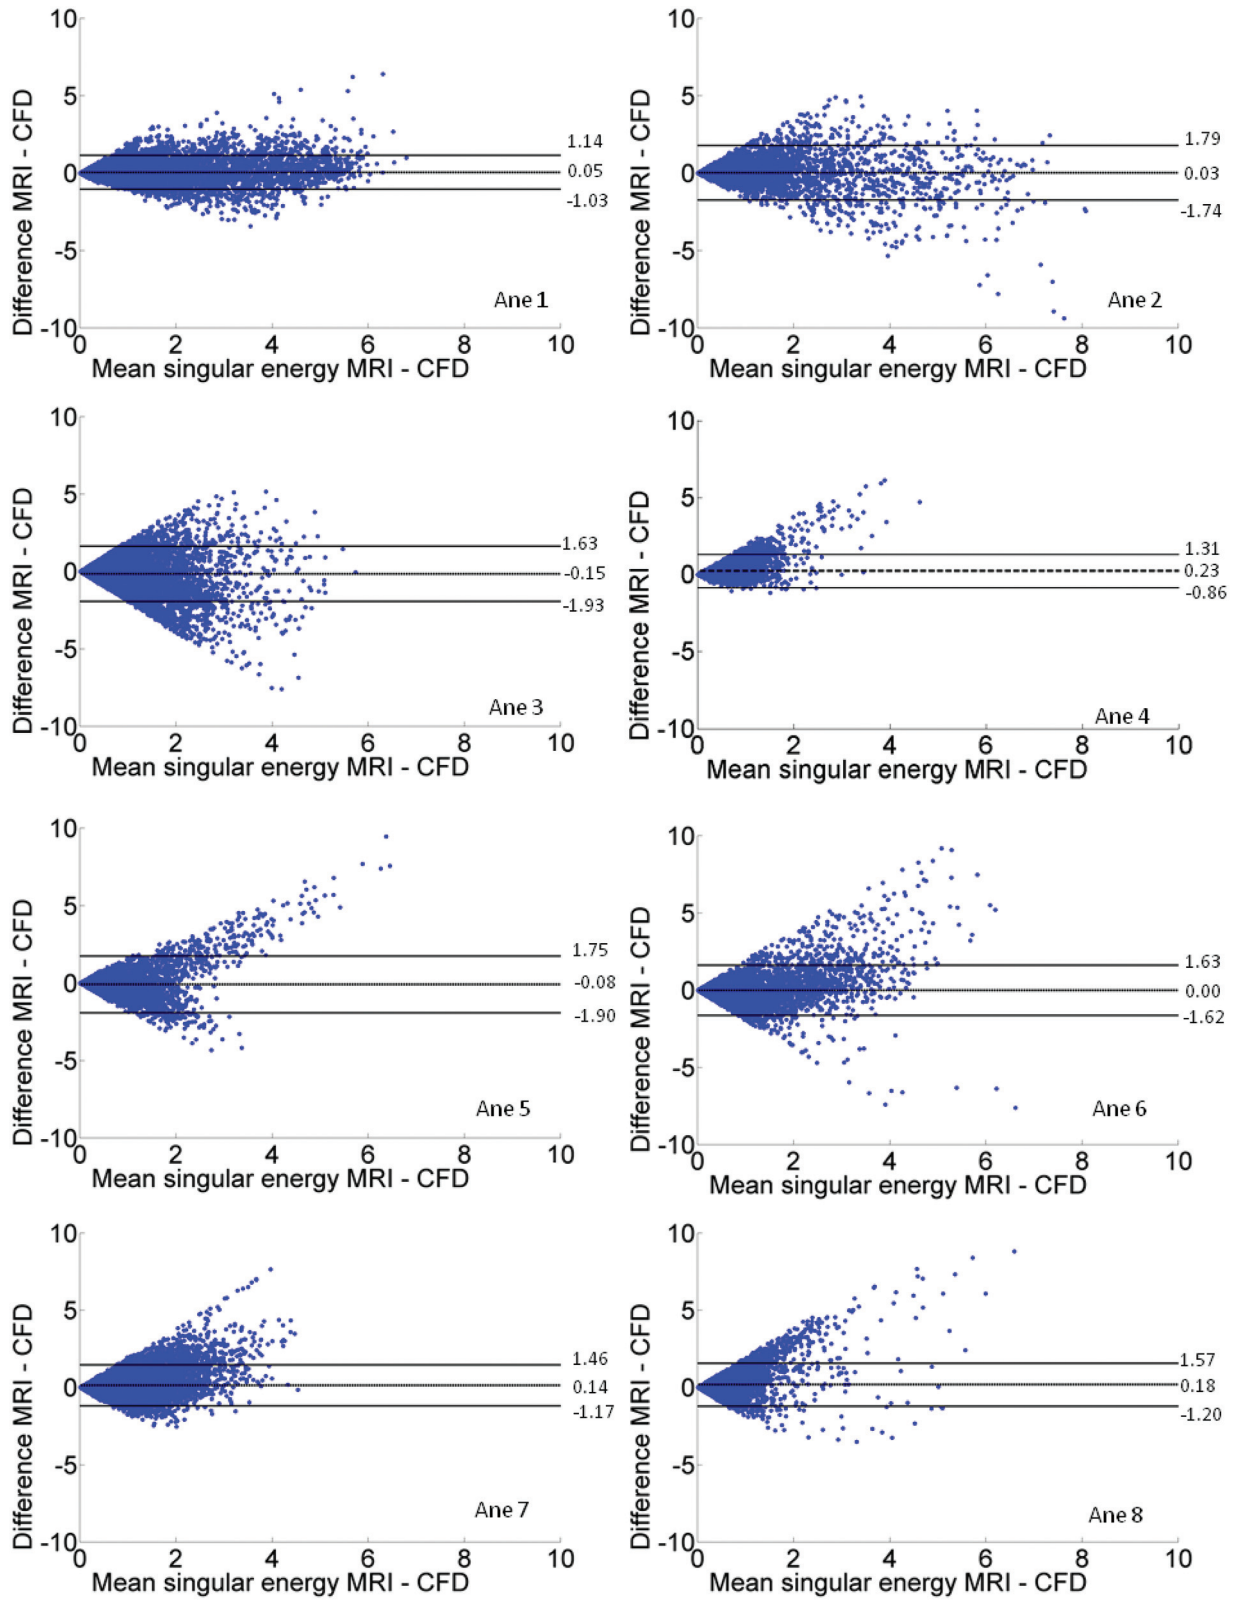

**ON-LINE FIG 2.** Bland-Altman plots showing the difference between singular energy from 3D PC-MRI and CFD, with inflow boundary conditions obtained from 2D PC-MRI.

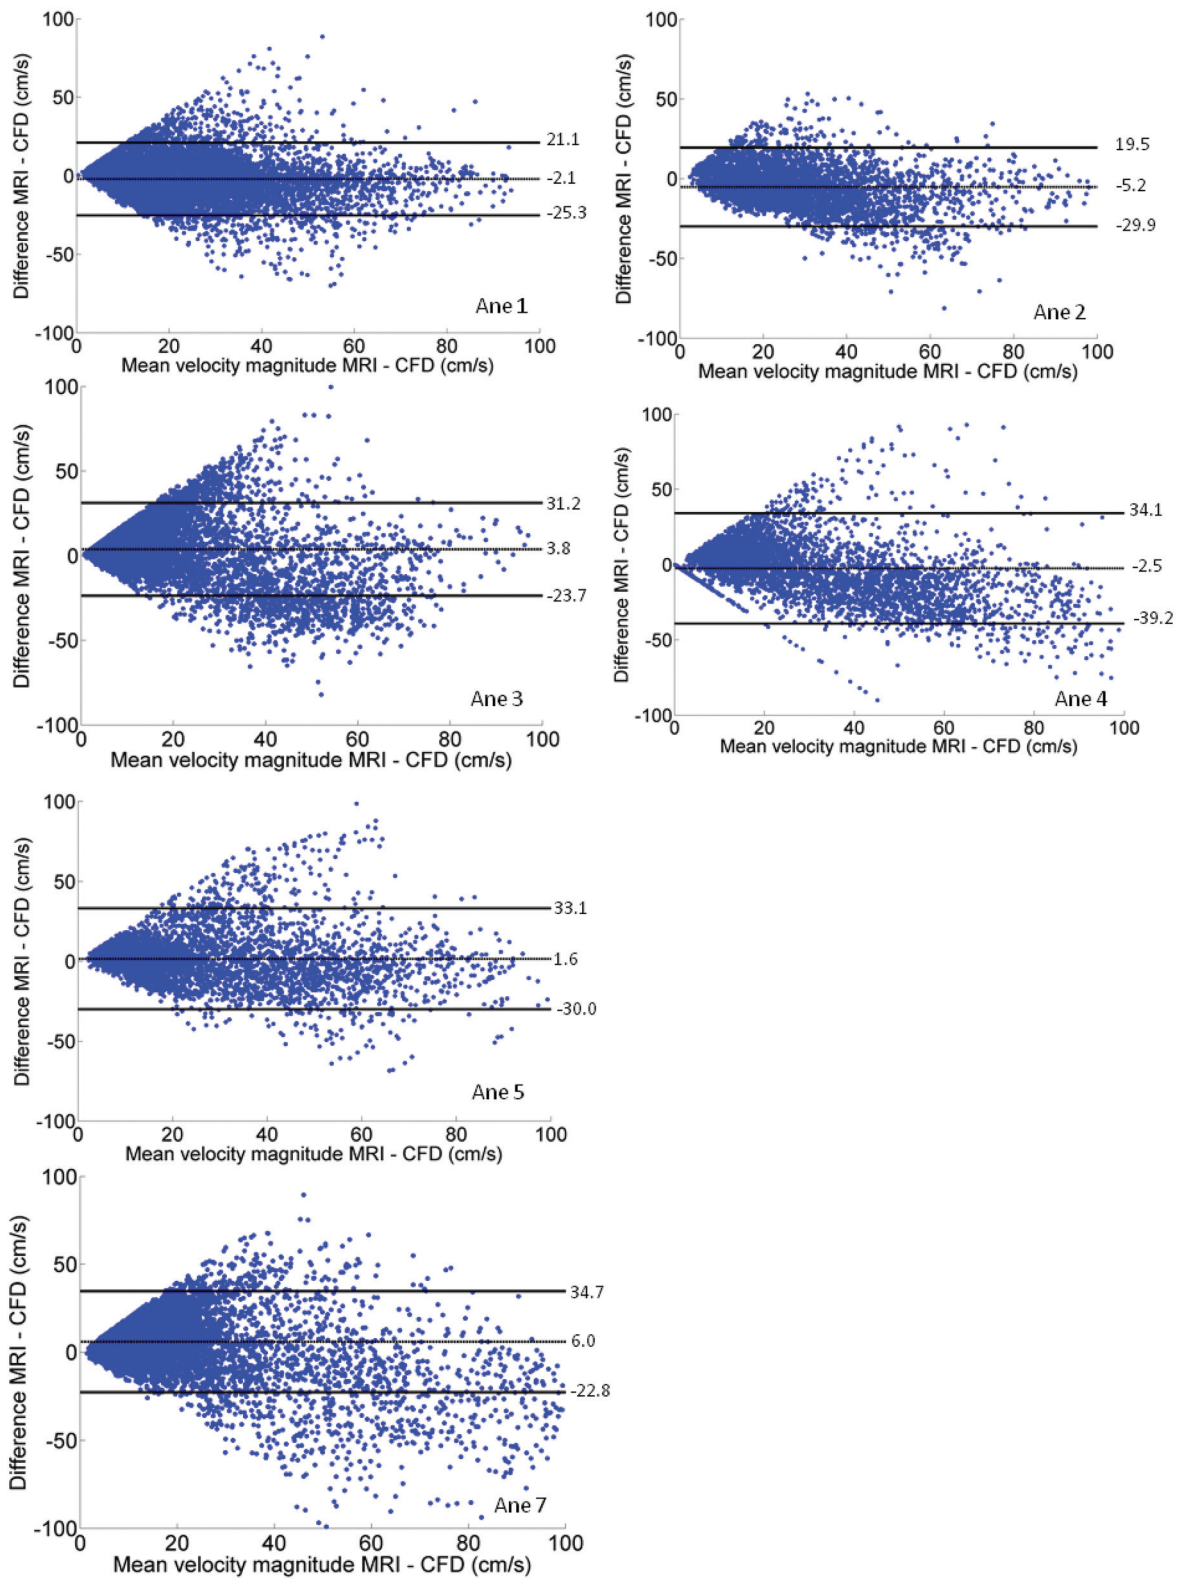

**ON-LINE FIG 3.** Bland-Altman plots showing the difference between velocity magnitude from 3D PC-MRI and CFD, with inflow boundary conditions obtained from 3D PC-MRI.

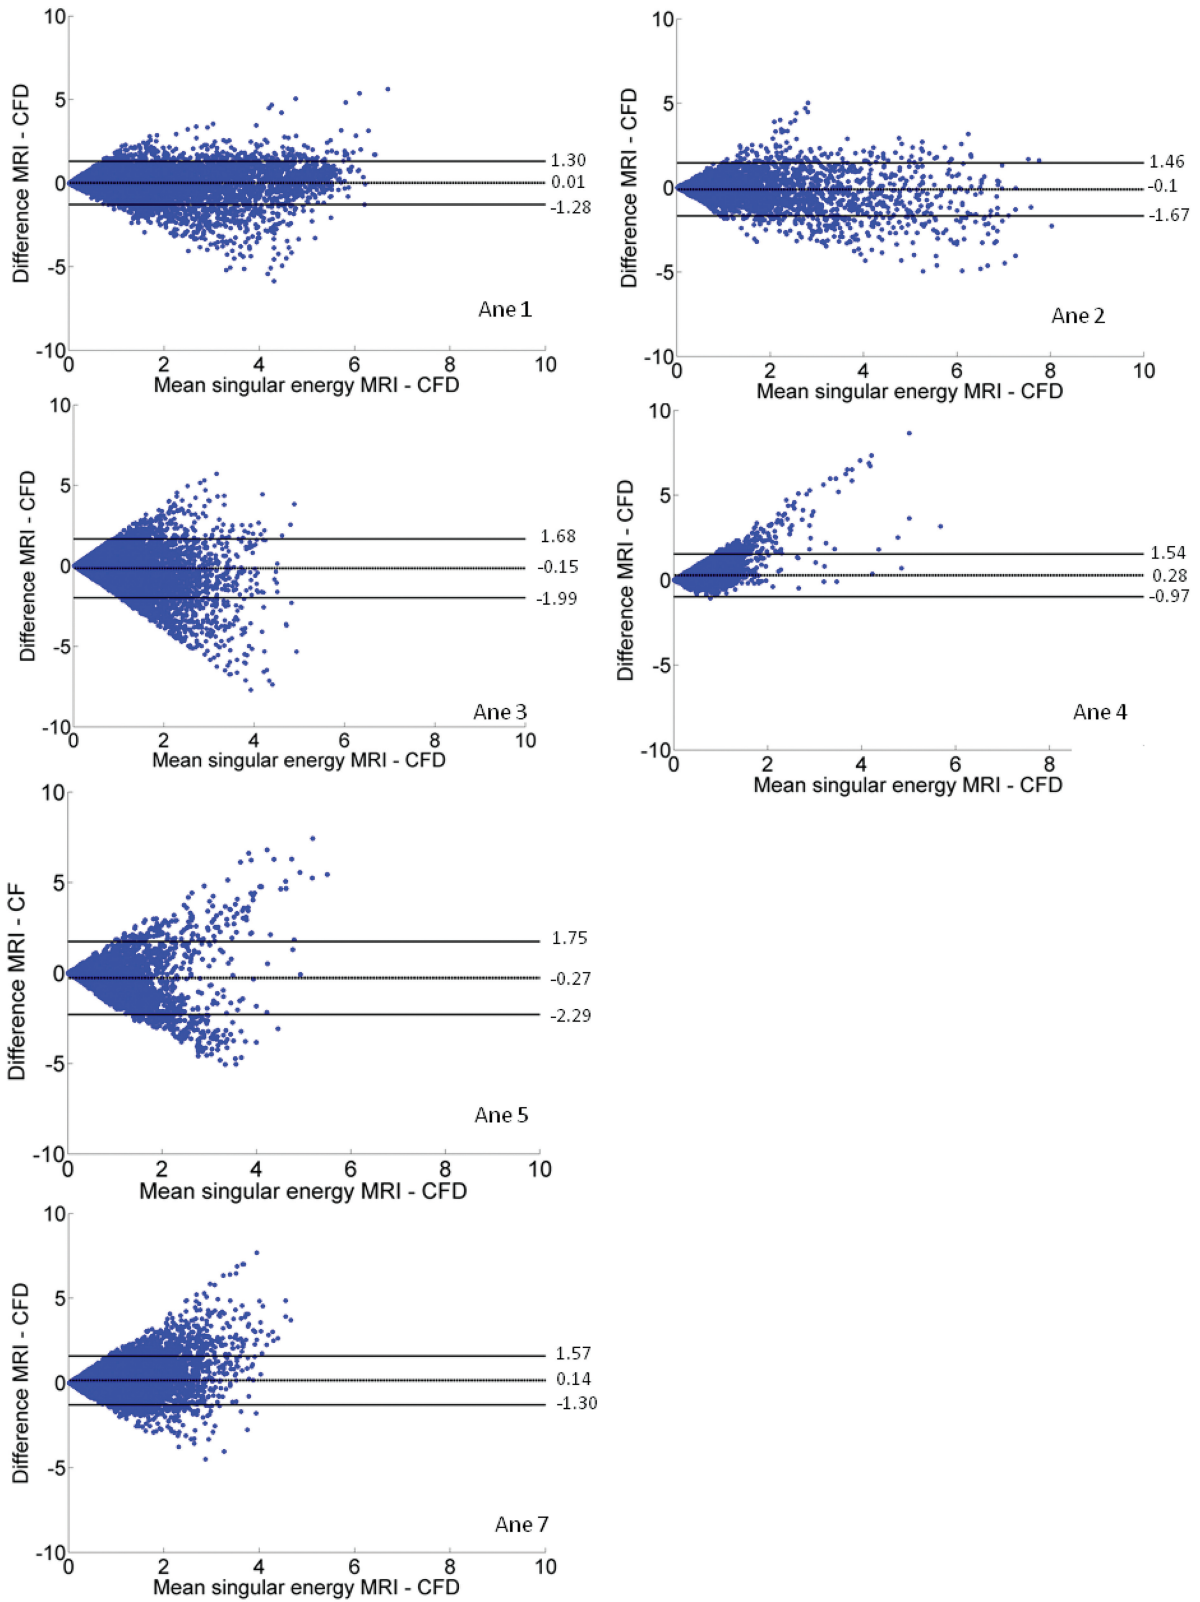

**ON-LINE FIG 4.** Bland-Altman plots showing the difference between singular energy from 3D PC-MRI and CFD, with inflow boundary conditions obtained from 3D PC-MRI.

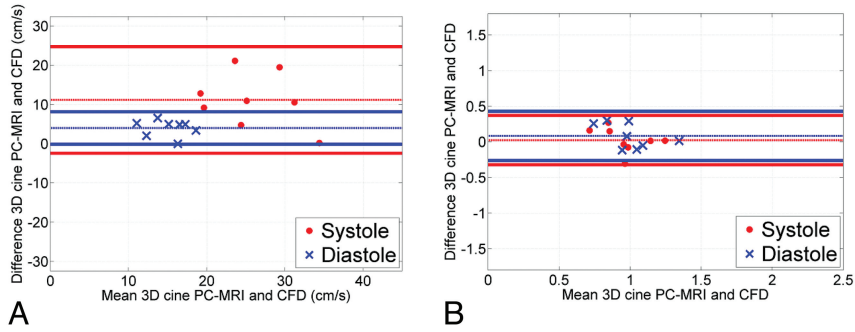

**ON-LINE FIG 5.** Bland-Altman plots for velocity magnitude (A) and singular energy difference (B) between 3D PC-MRI and CFD, with inflow boundary conditions obtained from 2D PC-MRI at peak systole and diastole for all aneurysms.

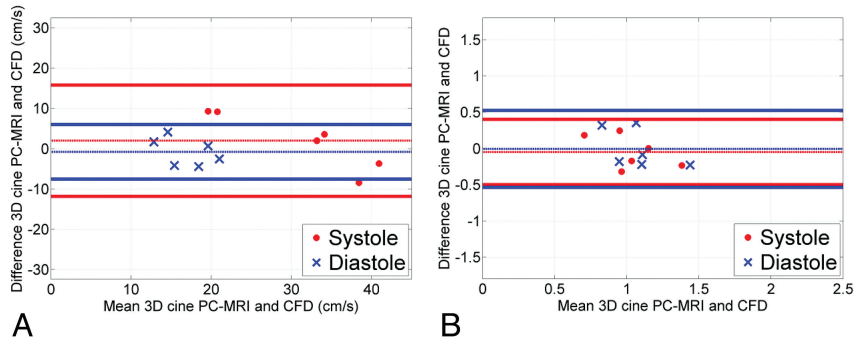

**ON-LINE FIG 6.** Bland-Altman plots for velocity magnitude (A) and singular energy difference (B) between 3D PC-MRI and CFD, with inflow boundary conditions obtained from 3D PC-MRI at peak systole and diastole for all aneurysms.

**On-line Table 1: Locations and size of the aneurysms, voxel size of the 3D rotational angiography datasets, volumes, number of elements, element density of the meshes and input flows, inflow vessel areas, mean velocity magnitude, and peak systolic velocity as measured by 2D and 3D PC-MR imaging**

| Aneurysm | Location  | Size<br>(mm, length × width × height) | Isotropic Voxel Size 3D RA (mm <sup>3</sup> ) | Mesh Volume (mm <sup>3</sup> ) | No. of Mesh Elements | Element Density (elements/mm <sup>3</sup> ) | Input Flow (mL/s) |                  | Inflow Vessel Area (mm <sup>2</sup> ) |                   | Input Mean Velocity Magnitude (cm/s) |                 | Input Peak Systolic Velocity (cm/s) |                 |
|----------|-----------|---------------------------------------|-----------------------------------------------|--------------------------------|----------------------|---------------------------------------------|-------------------|------------------|---------------------------------------|-------------------|--------------------------------------|-----------------|-------------------------------------|-----------------|
|          |           |                                       |                                               |                                |                      |                                             | 2D                | 3D               | 2D                                    | 3D                | 2D                                   | 3D              | 2D                                  | 3D              |
| 1        | Left MCA  | 12.6 × 7.3 × 9.1                      | 0.22                                          | 554                            | 1,765,310            | 3186                                        | 1.7 <sup>a</sup>  | 3.4 <sup>a</sup> | 5.9 <sup>a</sup>                      | 10.5 <sup>a</sup> | 31 <sup>a</sup>                      | 35 <sup>a</sup> | 89 <sup>a</sup>                     | 86 <sup>a</sup> |
| 2        | BA        | 7.4 × 6.2 × 6.4                       | 0.22                                          | 272                            | 1,422,476            | 5230                                        | 2.2               | 3.1              | 5.3                                   | 11.9              | 41                                   | 27              | 87                                  | 95              |
| 3        | Right MCA | 13.0 × 7.9 × 11.3                     | 0.25                                          | 732                            | 2,608,270            | 3563                                        | 2.0               | 3.8              | 3.6                                   | 10.2              | 57                                   | 39              | 111                                 | 110             |
| 4        | Right MCA | 5.6 × 5.0 × 7.2                       | 0.10                                          | 261                            | 1,467,689            | 5623                                        | 2.2               | 3.5              | 6.3                                   | 12.8              | 37                                   | 29              | 78                                  | 110             |
| 5        | Right MCA | 9.2 × 6.0 × 5.3                       | 0.17                                          | 260                            | 1,168,002            | 4492                                        | 1.9               | 3.2              | 4.0                                   | 10.3              | 49                                   | 31              | 102                                 | 99              |
| 6        | BA        | 8.8 × 8.7 × 11.5                      | 0.22                                          | 588                            | 2,313,009            | 4282                                        | 2.1 <sup>b</sup>  | 2.2 <sup>b</sup> | 6.9 <sup>b</sup>                      | 9.4 <sup>b</sup>  | 31 <sup>b</sup>                      | 25 <sup>b</sup> | 69 <sup>b</sup>                     | 78 <sup>b</sup> |
| 7        | Left MCA  | 12.0 × 12.1 × 9.7                     | 0.22                                          | 674                            | 2,238,552            | 3934                                        | 2.3               | 2.8              | 4.6                                   | 10.3              | 52                                   | 29              | 123                                 | 106             |
| 8        | BA        | 10.3 × 9.3 × 10.9                     | 0.22                                          | 687                            | 2,559,296            | 3725                                        | 2.6 <sup>b</sup>  | 2.9 <sup>b</sup> | 6.0 <sup>b</sup>                      | 12.6 <sup>b</sup> | 44 <sup>b</sup>                      | 24 <sup>b</sup> | 87 <sup>b</sup>                     | 89 <sup>b</sup> |

**Note:**—BA indicates basilar artery.

<sup>a</sup> The 2D PC-MR scan was obtained in the coiled aneurysm, 10 months after the 3D PC-MR scan of the uncoiled aneurysm.

<sup>b</sup> It was not possible to measure flow at the same locations because the 2D PC-MR was performed outside the imaging volume of the 3D PC-MR measurement.

**On-line Table 2: Differences between velocity fields as determined with 3D PC-MRI and CFD with boundary conditions obtained from 2D PC-MRI for the dome of the aneurysm and the inflow vessel<sup>a</sup>**

| No. | MDif (cm/s) |        |                             |          |        |  | SDif (%) |        |  |          |        |  | RDif (%) |        |  |          |        |  |
|-----|-------------|--------|-----------------------------|----------|--------|--|----------|--------|--|----------|--------|--|----------|--------|--|----------|--------|--|
|     | Systole     |        |                             | Diastole |        |  | Systole  |        |  | Diastole |        |  | Systole  |        |  | Diastole |        |  |
|     | Dome        | Inflow |                             | Dome     | Inflow |  | Dome     | Inflow |  | Dome     | Inflow |  | Dome     | Inflow |  | Dome     | Inflow |  |
| 1   | 17.9        | 39.5   |                             | 1.1      | 5.3    |  | 11.2     | 14.1   |  | 5.0      | 6.4    |  | 167.9    | 133.9  |  | 11.7     | 21.8   |  |
| 2   |             | 9.2    | -0.8 <sup>b</sup> (p = .32) | -1.1     | 5.9    |  | 14.2     | 23.1   |  | 7.6      | 9.2    |  | 2.7      | 17.7   |  | 7.6      | 26.5   |  |
| 3   | 12.5        | 18.7   |                             | 5.8      | 7.1    |  | 11.8     | 18.5   |  | 6.8      | 7.3    |  | 183.2    | 33.2   |  | 106.5    | 24.5   |  |
| 4   | 16.5        | 25.0   |                             | 6.3      | 1.4    |  | 10.3     | 22.5   |  | 6.7      | 12.4   |  | 270.1    | 59.2   |  | 103.1    | 4.6    |  |
| 5   | 6.2         | 18.7   |                             | 1.4      | 6.3    |  | 13.8     | 24.9   |  | 8.1      | 17.1   |  | 41.9     | 39.5   |  | 12.6     | 21.4   |  |
| 6   | 5.7         | 7.5    |                             | 6.0      | 4.0    |  | 10.9     | 13.5   |  | 12.8     | 10.6   |  | 31.3     | 16.1   |  | 14.0     | 14.7   |  |
| 7   | 12.6        | 17.3   |                             | 7.1      | 2.0    |  | 8.5      | 27.7   |  | 8.5      | 20.3   |  | 166.4    | 95.5   |  | 28.7     | 5.3    |  |
| 8   | 10.2        | 9.3    |                             | 5.4      | 4.3    |  | 14.1     | 21.8   |  | 13.0     | 10.7   |  | 77.9     | 19.1   |  | 51.1     | 18.9   |  |

<sup>a</sup> Indicated are MDif, SDif, and RDif, as determined on a voxel basis.

<sup>b</sup> Nonsignificant difference.

**On-line Table 3: Differences between velocity fields as determined with 3D PC-MRI and CFD<sup>a</sup>**

| Aneurysm | MDif (cm/s)                |           |                             |                            |            |            | SDif (cm/s) |            |             |             |             |             | RDif (%)   |            |             |             |       |       | Median Angle (°) |       |       |          |  |  |
|----------|----------------------------|-----------|-----------------------------|----------------------------|------------|------------|-------------|------------|-------------|-------------|-------------|-------------|------------|------------|-------------|-------------|-------|-------|------------------|-------|-------|----------|--|--|
|          | Systole                    |           |                             | Diastole                   |            |            | Systole     |            |             | Diastole    |             |             | Systole    |            |             | Diastole    |       |       | Systole          |       |       | Diastole |  |  |
|          | 2D BC                      | 3D BC     | 2D BC                       | 3D BC                      | 2D BC      | 3D BC      | 2D BC       | 3D BC      | 2D BC       | 3D BC       | 2D BC       | 3D BC       | 2D BC      | 3D BC      | 2D BC       | 3D BC       | 2D BC | 3D BC | 2D BC            | 3D BC | 2D BC | 3D BC    |  |  |
| 1        | 21.1                       | 1.9       | 2.0                         | -4.2                       | 12.7       | 17.0       | 6.3         | 8.1        | 161.8       | 6.0         | 17.8        | 23.9        | 20.6       | 20.8       | 26.5        | 27.8        |       |       |                  |       |       |          |  |  |
| 2        | 0.2 <sup>b</sup> (P = .77) | -8.5      | -0.0 <sup>b</sup> (P = .97) | -4.5                       | 17.1       | 16.9       | 8.5         | 9.7        | 0.6         | 19.9        | 0.1         | 21.5        | 16.9       | 18.5       | 24.7        | 25.5        |       |       |                  |       |       |          |  |  |
| 3        |                            | 9.2       | 5.2                         | 1.6                        | 18.0       | 17.8       | 9.6         | 12.0       | 61.0        | 61.4        | 62.1        | 13.7        | 37.3       | 33.3       | 52.6        | 50.7        |       |       |                  |       |       |          |  |  |
| 4        |                            | 19.5      | -3.7 (P = .002)             | 4.9                        | 17.9       | 26.3       | 10.2        | 12.8       | 99.6        | 8.7         | 33.4        | 11.5        | 26.3       | 24.0       | 30.3        | 31.0        |       |       |                  |       |       |          |  |  |
| 5        |                            | 10.5      | 3.5                         | 0.7 <sup>b</sup> (P = .21) | 17.2       | 19.3       | 10.9        | 11.9       | 40.6        | 10.8        | 20.0        | 3.5         | 21.1       | 22.0       | 25.5        | 27.5        |       |       |                  |       |       |          |  |  |
| 6        |                            | 4.8       | -                           | 4.8                        | 14.2       | -          | 12.2        | -          | 21.6        | -           | 34.3        | -           | 27.2       | -          | 48.4        | -           |       |       |                  |       |       |          |  |  |
| 7        |                            | 12.8      | 9.1                         | 6.5                        | 12.0       | 16.9       | 10.4        | 13.4       | 100.1       | 56.0        | 62.6        | 32.2        | 32.2       | 37.3       | 44.1        | 49.1        |       |       |                  |       |       |          |  |  |
| 8        |                            | 10.9      | -                           | 5.0                        | 19.8       | -          | 13.0        | -          | 55.7        | -           | 39.3        | -           | 34.4       | -          | 49.7        | -           |       |       |                  |       |       |          |  |  |
| Average  | 11.1 ± 6.9                 | 1.9 ± 7.0 | 4.0 ± 2.1                   | -0.8 ± 3.5                 | 16.1 ± 2.8 | 19.0 ± 3.7 | 10.1 ± 2.1  | 11.3 ± 2.0 | 67.6 ± 51.4 | 27.1 ± 24.9 | 33.7 ± 21.5 | 17.7 ± 10.2 | 27.0 ± 7.2 | 26.0 ± 7.5 | 37.7 ± 12.1 | 35.3 ± 11.5 |       |       |                  |       |       |          |  |  |

**Note:**—2D BC indicates the CFD simulations with inflow boundary conditions from 2D PC-MRI; 3D BC, CFD with inflow boundary conditions obtained from 3D PC-MRI; —, not possible to perform the CFD with inflow boundary condition obtained from 3D PC-MRI because the CFD inflow boundary was located outside the imaging volume of the 3D PC-MRI measurement.

<sup>a</sup> Indicated MDif, SDif, and RDif and the median angle as determined on a voxel basis and averaged over the whole aneurysm and connecting vessels, between 3D PC-MRI and CFD.

<sup>b</sup> Nonsignificant difference. All P values not given were P < .0001.

**On-line Table 4: Differences between singular-energy fields as determined with 3D PC-MRI and CFD<sup>a</sup>**

| Aneurysm | MDif                         |                             |                             |              |             |             | SDif        |             |             |             |             |             | RDif (%) |       |       |          |  |  |
|----------|------------------------------|-----------------------------|-----------------------------|--------------|-------------|-------------|-------------|-------------|-------------|-------------|-------------|-------------|----------|-------|-------|----------|--|--|
|          | Systole                      |                             |                             | Diastole     |             |             | Systole     |             |             | Diastole    |             |             | Systole  |       |       | Diastole |  |  |
|          | 2D BC                        | 3D BC                       | 2D BC                       | 3D BC        | 2D BC       | 3D BC       | 2D BC       | 3D BC       | 2D BC       | 3D BC       | 2D BC       | 3D BC       | 2D BC    | 3D BC | 2D BC | 3D BC    |  |  |
| 1        | 0.02 <sup>b</sup> (P = .42)  | 0.00 <sup>b</sup> (P = .93) | -0.05 (P = .001)            | -0.09        | 0.66        | 0.67        | 0.55        | 0.74        | 1.3         | 0.1         | 4.4         | 7.5         |          |       |       |          |  |  |
| 2        | 0.02 <sup>b</sup> (P = .55)  | -0.23                       | 0.01 <sup>b</sup> (P = .74) | -0.23        | 0.64        | 0.79        | 1.01        | 1.06        | 1.3         | 15.6        | 11          | 14.7        |          |       |       |          |  |  |
| 3        | -0.08 (P = .0007)            | -0.17                       | -0.11 (P = .002)            | -0.22        | 0.83        | 0.93        | 1.24        | 1.41        | 7.6         | 15.3        | 9.7         | 18.2        |          |       |       |          |  |  |
| 4        | 0.16                         | 0.18                        | 0.30                        | 0.32         | 0.60        | 0.51        | 1.12        | 1.18        | 25.6        | 29.6        | 43.8        | 47.6        |          |       |       |          |  |  |
| 5        | -0.04 <sup>b</sup> (P = .37) | -0.32                       | -0.12 (P = .0003)           | -0.18        | 0.91        | 0.94        | 0.75        | 0.97        | 3.6         | 28.5        | 11.6        | 17.4        |          |       |       |          |  |  |
| 6        | -0.31                        | -                           | 0.08 (P = .015)             | -            | 0.97        | -           | 0.94        | -           | 27.4        | -           | 8.2         | -           |          |       |       |          |  |  |
| 7        | 0.15                         | 0.24                        | 0.29                        | 0.35         | 0.57        | 0.86        | 1.08        | 1.11        | 19.1        | 29.2        | 34.6        | 39.6        |          |       |       |          |  |  |
| 8        | 0.27                         | -                           | 0.26                        | -            | 0.79        | -           | 0.76        | -           | 37.8        | -           | 41.7        | -           |          |       |       |          |  |  |
| Average  | 0.02 ± 0.17                  | -0.05 ± 0.23                | 0.08 ± 0.18                 | -0.01 ± 0.27 | 0.75 ± 0.15 | 0.78 ± 0.17 | 0.93 ± 0.23 | 1.08 ± 0.22 | 15.5 ± 13.9 | 19.7 ± 11.7 | 19.4 ± 17.6 | 24.2 ± 15.7 |          |       |       |          |  |  |

**Note:**—2D BC indicates the CFD simulations with inflow boundary conditions from 2D PC-MRI; 3D BC, CFD with inflow boundary conditions obtained from 3D PC-MRI; —, not possible to perform the CFD with inflow boundary condition obtained from 3D PC-MRI because the CFD inflow boundary was located outside the imaging volume of the 3D PC-MRI measurement.

<sup>a</sup> Indicated are MDif, SDif, and RDif, and the median angle, as determined on a voxel basis and averaged over the whole aneurysm and connecting vessels, between 3D PC-MRI and CFD.

<sup>b</sup> Nonsignificant difference. All P values not given were P < .0001.
